# Supplementary material for: The effect of voluntary head movements on postural kinetics in the standing cat
Source: PeerJ. 2019 Dec 12;7:e8186. doi: 10.7717/peerj.8186 (PMC6911694; doi:10.7717/peerj.8186)
Supplement: Supplemental Information 1 [file peerj-07-8186-s001.xlsx]

## Sheet: Neutral position
Neutral position
	L-Forelimb	R-Forelimb	L-Hind limb	R-Hind limb
1	85	85	55	45
	70	60	40	40
	65	60	50	50
	60	65	45	40
	55	60	45	45
Mean	67	66	47	44
2	80	85	35	35
	70	50	60	50
	65	75	55	45
	75	70	60	50
	55	60	35	45
Mean	69	68	49	45
3	80	85	60	45
	70	60	50	50
	70	60	50	50
	75	65	30	35
	55	65	60	60
Mean	70	67	50	48
4	80	75	60	50
	75	60	40	40
	70	70	30	35
	60	55	35	45
	55	70	60	60
Mean	68	66	45	46
5	75	65	40	40
	60	65	60	60
	75	70	50	40
	75	70	35	40
	70	65	50	45
Mean	71	67	47	45
6	60	60	60	60
	75	65	35	35
	75	65	60	50
	60	65	35	45
	60	70	55	60
Mean	66	65	49	50

## Sheet: Left position
Left position
	L-Forelimb	R-Forelimb	L-Hind limb	R-Hind limb
1	60	120	50	45
	35	90	55	50
	40	85	45	45
	40	80	45	45
	65	70	50	45
Mean	48	89	49	46
2	35	115	40	50
	45	90	35	45
	35	85	55	50
	60	75	50	50
	60	70	50	50
Mean	47	87	46	49
3	40	110	50	50
	50	90	40	45
	35	85	65	50
	45	75	45	40
	60	70	55	50
Mean	46	86	51	47
4	45	105	45	40
	35	90	45	60
	40	85	45	45
	75	80	40	45
	60	75	45	50
Mean	51	87	44	48
5	45	105	45	45
	35	85	45	65
	40	80	50	45
	65	75	55	35
	65	70	50	50
Mean	50	83	49	48
6	35	100	30	35
	40	95	50	45
	60	80	50	50
	45	75	45	45
	65	70	55	50
Mean	49	84	46	45

## Sheet: Right position
Right position
	L-Forelimb	R-Forelimb	L-Hind limb	R-Hind limb
1	135	60	55	60
	95	45	55	40
	80	75	40	40
	60	35	45	55
	60	35	45	45
Mean	86	50	48	48
2	120	50	40	45
	105	45	50	50
	80	50	55	40
	70	45	45	45
	65	45	45	55
Mean	88	47	47	47
3	120	55	50	50
	85	50	55	35
	85	45	50	40
	85	45	45	55
	60	35	45	50
Mean	87	46	49	46
4	115	50	40	50
	100	40	35	45
	80	65	60	50
	80	35	60	45
	80	35	55	45
Mean	91	45	50	47
5	110	45	45	50
	90	50	45	45
	85	55	50	40
	85	45	45	50
	85	45	45	45
Mean	91	48	46	46
6	110	50	45	45
	105	50	50	50
	100	45	35	55
	75	50	55	45
	60	55	50	55
Mean	90	50	47	50
