# Supplementary material for: The effect of voluntary head movements on postural kinetics in the standing cat
Source: PeerJ. 2019 Dec 12;7:e8186. doi: 10.7717/peerj.8186 (PMC6911694; doi:10.7717/peerj.8186)
Supplement: Supplemental Information 2 [file peerj-07-8186-s002.xlsx]

## Sheet: Neutral position
Neutral position
	L-Forelimb	R-Forelimb	L-Hind limb	R-Hind limb
1	1.8	1.8	1.2	1
	1.8	1.5	1.2	1
	1.5	1.6	1.4	1
	1.2	1.2	1.4	1.6
	1.2	1.2	1	1.8
Mean	1.5	1.46	1.24	1.28
2	2	1.6	1	1
	1.4	1.5	1.2	1.2
	1.5	1.5	1.2	1.5
	1.2	1.2	1	1.2
	1.2	1.8	1.2	1.4
Mean	1.46	1.52	1.12	1.26
3	2	1.5	1.2	1
	1.6	1.6	1	1.2
	1.3	1.4	1.8	1.5
	1.2	1.4	1.2	1.5
	1.5	1.5	1.2	1
Mean	1.52	1.48	1.28	1.24
4	1.7	1.7	1	1
	1.6	1.5	1	1
	1.5	1.5	1.4	1.5
	1.2	1.4	1.2	1
	1.2	1.4	1.2	1.5
Mean	1.44	1.5	1.16	1.2
5	1.6	1.5	0.8	1.2
	1.8	1.5	1	1.2
	1.6	1.4	1.8	1.2
	1.2	1.6	1	1
	1.2	1.2	1.5	1.5
Mean	1.48	1.44	1.22	1.22
6	1.7	1.6	1.2	1.2
	1.6	1.5	1	1.2
	1.6	1.4	1.5	1.2
	1.5	1.6	1	1
	1.3	1.5	1.5	1.2
Mean	1.54	1.52	1.24	1.16

## Sheet: Left position
Left position
	L-Forelimb	R-Forelimb	L-Hind limb	R-Hind limb
1	1.2	1.8	1.5	1.2
	1	1.7	1	1.2
	1.1	1.6	1.2	1.4
	1.2	1.6	1	1
	1.3	1.6	1.2	1.2
Mean	1.16	1.66	1.18	1.2
2	1	1.6	1	1
	1.2	1.7	1.4	1.2
	1.2	1.6	1.2	1.2
	1.2	1.8	1.2	1.4
	1.3	1.8	1.2	1.5
Mean	1.18	1.7	1.2	1.26
3	1.2	1.6	1	1.4
	1.1	1.8	1.5	1.2
	1.2	1.6	1.5	1.4
	1.2	1.7	1.2	1.2
	1.3	1.6	1.2	1.2
Mean	1.2	1.66	1.28	1.28
4	1.3	1.7	1.5	2
	1.2	1.6	1	1
	1.2	1.6	1.2	1
	1.3	1.9	1.4	1
	1.2	1.8	1.2	1.2
Mean	1.24	1.72	1.26	1.24
5	1.3	1.6	1	1
	1.2	1.7	1.5	1
	1.5	1.5	1.2	1.4
	1.2	1.6	1	1.2
	1.1	1.7	1.5	1.5
Mean	1.26	1.62	1.24	1.22
6	1.4	1.7	1	1
	1.2	1.6	1.5	2
	1.3	1.7	1.2	1
	1.2	1.6	1.2	1.2
	1	1.6	1.2	1
Mean	1.22	1.64	1.22	1.24

## Sheet: Right position
Right position
	L-Forelimb	R-Forelimb	L-Hind limb	R-Hind limb
1	1.8	1.5	1	1
	1.7	1	1	1
	1.8	1.2	1.6	1.7
	1.6	1.3	1.5	1.5
	1.6	1.2	1.2	1
Mean	1.7	1.24	1.26	1.24
2	1.5	1	1.5	1.5
	1.7	1	1.5	1.5
	1.7	1.4	1.4	0.8
	1.6	1.2	0.8	1.2
	1.6	1.3	0.8	1
Mean	1.62	1.18	1.2	1.2
3	1.8	1.3	1.2	1.5
	1.7	1.3	1.2	1.3
	1.6	1.2	1	1
	1.6	1.2	1.8	1
	1.7	1.3	1	1
Mean	1.68	1.26	1.24	1.16
4	1.7	1.3	1.5	1.4
	1.6	1.2	1.2	1.5
	1.7	1.2	1	1
	1.7	1.4	1.4	1.2
	1.5	1.3	1	1
Mean	1.64	1.28	1.22	1.22
5	1.6	1.3	1	0.8
	1.5	1.4	2	1.6
	1.6	1.2	1.2	1.5
	1.7	1.1	1	1
	1.7	1	1	1
Mean	1.62	1.2	1.24	1.18
6	1.6	1.3	1.5	1.4
	1.7	1.1	1	1.1
	1.8	1.2	1	1.2
	1.7	1.3	1.2	1.3
	1.5	1	1.2	1
Mean	1.66	1.18	1.18	1.2
