# Supplementary material for: The effect of voluntary head movements on postural kinetics in the standing cat
Source: PeerJ. 2019 Dec 12;7:e8186. doi: 10.7717/peerj.8186 (PMC6911694; doi:10.7717/peerj.8186)
Supplement: Supplemental Information 3 [file peerj-07-8186-s003.xlsx]

## Sheet: Neutral position
Neutral position
	COPx	COPy
1	21.1	9.35
	17.42	14.87
	16.32	10.38
	18.78	11.77
	16.71	8.11
Mean	18.066	10.896
2	21.19	9.31
	17.22	14.91
	16.36	10.37
	17.77	9.2
	16.79	8.12
Mean	17.866	10.382
3	21.47	9.28
	17.02	14.81
	16.18	10.63
	19.71	8.4
	16.94	8.48
Mean	18.264	10.32
4	20	8.68
	17.32	14.87
	16.29	10.58
	18.45	11.6
	17.08	8.53
Mean	17.828	10.852
5	19.74	8.46
	17.3	14.85
	16.62	10.61
	17.19	8.19
	18.47	11.66
Mean	17.864	10.754
6	18.22	11.79
	18.55	9.04
	17.47	9.83
	18.57	11.28
	18.54	11.31
Mean	18.27	10.65

## Sheet: Left position
Left position
	COPx	COPy
1	20.11	8.06
	16.16	14.26
	18.19	12.45
	16.97	11.52
	17.16	11.82
Mean	17.718	11.622
2	19.91	7.8
	16.15	14.28
	18.23	13.33
	16.85	11.48
	17.84	12.69
Mean	17.796	11.916
3	19.79	8.01
	16.1	14.49
	17.49	10.03
	16.21	11.62
	18.09	13.49
Mean	17.536	11.528
4	19.49	8.09
	16.34	14.24
	15.57	13.95
	16.7	10.58
	18.05	12.58
Mean	17.23	11.888
5	19.43	9.14
	17.18	10.17
	18.64	13.5
	16.83	11.7
	18.54	13.35
Mean	18.124	11.572
6	18.76	13.49
	18.43	12.73
	18.3	12.91
	16.81	10.44
	17.15	10.32
Mean	17.89	11.978

## Sheet: Right position
Right position
	COPx	COPy
1	22.77	8.5
	16.39	13.76
	16.28	9.58
	16.9	9.63
	17.51	7.66
Mean	17.97	9.826
2	22.68	8.84
	16.6	13.66
	16.58	7.69
	17.28	9.81
	17.45	7.7
Mean	18.118	9.54
3	22.56	8.5
	16.88	13.82
	16.4	7.79
	17.74	10.9
	17.25	7.51
Mean	18.166	9.704
4	22.48	8.51
	16.28	13.71
	18.01	10.65
	16.53	7.68
	17.51	7.82
Mean	18.162	9.674
5	21.52	8.36
	16.72	7.62
	16.64	7.82
	17.79	10.93
	16.5	13.7
Mean	17.834	9.686
6	18.11	10.77
	17.65	9.74
	17.64	7.6
	18.09	10.76
	17.45	9.7
Mean	17.788	9.714
